# Supplementary material
Source: MDPI journal article supplement (https://www.mdpi.com/2673-866X/2/1/3)
Supplement: s1 [file s1 › traumacare-1496016-supplementary.pdf]

## SUPPLEMENTARY MATERIALS

### **Pre-hospital use of hemostatic devices for the control of junctional and abdominal traumatic hemorrhage: A systematic re-view**

Rhiannon Humphries <sup>1</sup>, David Naumann <sup>1</sup> and Zubair Ahmed <sup>1,2,3,\*</sup>

<sup>1</sup> Institute of Inflammation and Ageing, College of Medical and Dental Sciences, University of Birmingham, Edgbaston, Birmingham, B152TT, UK; rhiannon.humphries@warwick.ac.uk; david.naumann@nhs.net; z.ahmed.1@bham.ac.uk

<sup>2</sup> Centre for Trauma Sciences Research, University of Birmingham, Edgbaston, Birmingham, B15 2TT, UK

<sup>3</sup> Surgical Reconstruction and Microbiology Research Centre, National Institute for Health Research, Queen Elizabeth Hospital, Birmingham, B15 2TH, UK.

\*Correspondence: z.ahmed.1@bham.ac.uk

## **Supplementary Materials**

Figure S1. Embase search strategy

Figure S2. Medline search strategy

Figure S3. CINAHL search strategy

Table S1. Web of Science search strategy

| ▼ Search History (21) |                                                                                                                                                                                                                                                                |         |          |                        | View Saved  |          |
|-----------------------|----------------------------------------------------------------------------------------------------------------------------------------------------------------------------------------------------------------------------------------------------------------|---------|----------|------------------------|-------------|----------|
| #                     | Searches                                                                                                                                                                                                                                                       | Results | Type     | Actions                | Annotations |          |
| 1                     | exp injury/                                                                                                                                                                                                                                                    | 2312328 | Advanced | Display Results More ▼ |             | Contract |
| 2                     | exp bleeding/                                                                                                                                                                                                                                                  | 970513  | Advanced | Display Results More ▼ |             |          |
| 3                     | exp exsanguination/                                                                                                                                                                                                                                            | 1111    | Advanced | Display Results More ▼ |             |          |
| 4                     | (non-compressible adj3 (bleeding or h?emorrhage or exsanguination)).mp. [mp=title, abstract, heading word, drug trade name, original title, device manufacturer, drug manufacturer, device trade name, keyword, floating subheading word, candidate term word] | 120     | Advanced | Display Results More ▼ |             |          |
| 5                     | 1 or 2 or 3 or 4                                                                                                                                                                                                                                               | 3047234 | Advanced | Display Results More ▼ |             |          |
| 6                     | emergency health service/                                                                                                                                                                                                                                      | 104997  | Advanced | Display Results More ▼ |             |          |
| 7                     | "out-of-hospital".mp. [mp=title, abstract, heading word, drug trade name, original title, device manufacturer, drug manufacturer, device trade name, keyword, floating subheading word, candidate term word]                                                   | 21818   | Advanced | Display Results More ▼ |             |          |
| 8                     | "pre-hospital".mp. [mp=title, abstract, heading word, drug trade name, original title, device manufacturer, drug manufacturer, device trade name, keyword, floating subheading word, candidate term word]                                                      | 8884    | Advanced | Display Results More ▼ |             |          |
| 9                     | (ambulance or helicopter).mp. [mp=title, abstract, heading word, drug trade name, original title, device manufacturer, drug manufacturer, device trade name, keyword, floating subheading word, candidate term word]                                           | 24897   | Advanced | Display Results More ▼ |             |          |
| 10                    | prehospital.mp. [mp=title, abstract, heading word, drug trade name, original title, device manufacturer, drug manufacturer, device trade name, keyword, floating subheading word, candidate term word]                                                         | 18845   | Advanced | Display Results More ▼ |             |          |
| 11                    | rescue personnel/                                                                                                                                                                                                                                              | 8216    | Advanced | Display Results More ▼ |             |          |
| 12                    | paramedic.mp.                                                                                                                                                                                                                                                  | 4400    | Advanced | Display Results More ▼ |             |          |
| 13                    | 6 or 7 or 8 or 9 or 10 or 11 or 12                                                                                                                                                                                                                             | 157092  | Advanced | Display Results More ▼ |             |          |
| 14                    | h?emostatic device.mp.                                                                                                                                                                                                                                         | 170     | Advanced | Display Results More ▼ |             |          |
| 15                    | tamponade therap*.mp.                                                                                                                                                                                                                                          | 23      | Advanced | Display Results More ▼ |             |          |
| 16                    | balloon occlusion/ or aortic occlusion/ or reboa.mp.                                                                                                                                                                                                           | 5803    | Advanced | Display Results More ▼ |             |          |
| 17                    | (junction* adj3 tourniquet).mp. [mp=title, abstract, heading word, drug trade name, original title, device manufacturer, drug manufacturer, device trade name, keyword, floating subheading word, candidate term word]                                         | 70      | Advanced | Display Results More ▼ |             |          |
| 18                    | (abdom* adj3 tourniquet).mp. [mp=title, abstract, heading word, drug trade name, original title, device manufacturer, drug manufacturer, device trade name, keyword, floating subheading word, candidate term word]                                            | 32      | Advanced | Display Results More ▼ |             |          |
| 19                    | ITClamp.mp. [mp=title, abstract, heading word, drug trade name, original title, device manufacturer, drug manufacturer, device trade name, keyword, floating subheading word, candidate term word]                                                             | 23      | Advanced | Display Results More ▼ |             |          |
| 20                    | 14 or 15 or 16 or 17 or 18 or 19                                                                                                                                                                                                                               | 6088    | Advanced | Display Results More ▼ |             |          |
| 21                    | 5 and 13 and 20                                                                                                                                                                                                                                                | 198     | Advanced | Display Results More ▼ |             |          |

Figure S1. Embase search strategy

| ▼ Search History (23) |                                                                                                                                                                                                                                                                                                                                                             |         |          |                        | View Saved  |          |
|-----------------------|-------------------------------------------------------------------------------------------------------------------------------------------------------------------------------------------------------------------------------------------------------------------------------------------------------------------------------------------------------------|---------|----------|------------------------|-------------|----------|
| #                     | Searches                                                                                                                                                                                                                                                                                                                                                    | Results | Type     | Actions                | Annotations |          |
| 1                     | exp "Wounds and Injuries"/                                                                                                                                                                                                                                                                                                                                  | 940282  | Advanced | Display Results More ▼ |             | Contract |
| 2                     | exp Hemorrhage/                                                                                                                                                                                                                                                                                                                                             | 340712  | Advanced | Display Results More ▼ |             |          |
| 3                     | bleeding.mp.                                                                                                                                                                                                                                                                                                                                                | 187698  | Advanced | Display Results More ▼ |             |          |
| 4                     | (non-compressible adj3 (bleeding or h?emorrhage or exsanguination)).mp. [mp=title, abstract, original title, name of substance word, subject heading word, floating sub-heading word, keyword heading word, organism supplementary concept word, protocol supplementary concept word, rare disease supplementary concept word, unique identifier, synonyms] | 48      | Advanced | Display Results More ▼ |             |          |
| 5                     | 1 or 2 or 3 or 4                                                                                                                                                                                                                                                                                                                                            | 1334935 | Advanced | Display Results More ▼ |             |          |
| 6                     | Emergency Medical Services/                                                                                                                                                                                                                                                                                                                                 | 44878   | Advanced | Display Results More ▼ |             |          |
| 7                     | "out-of-hospital".mp.                                                                                                                                                                                                                                                                                                                                       | 11648   | Advanced | Display Results More ▼ |             |          |
| 8                     | exp Emergency Medical Technicians/                                                                                                                                                                                                                                                                                                                          | 5829    | Advanced | Display Results More ▼ |             |          |
| 9                     | paramedic.mp.                                                                                                                                                                                                                                                                                                                                               | 2441    | Advanced | Display Results More ▼ |             |          |
| 10                    | exp Air Ambulances/                                                                                                                                                                                                                                                                                                                                         | 2978    | Advanced | Display Results More ▼ |             |          |
| 11                    | exp Ambulances/                                                                                                                                                                                                                                                                                                                                             | 9133    | Advanced | Display Results More ▼ |             |          |
| 12                    | (prehospital or pre-hospital).mp. [mp=title, abstract, original title, name of substance word, subject heading word, floating sub-heading word, keyword heading word, organism supplementary concept word, protocol supplementary concept word, rare disease supplementary concept word, unique identifier, synonyms]                                       | 15556   | Advanced | Display Results More ▼ |             |          |
| 13                    | 6 or 7 or 8 or 9 or 10 or 11 or 12                                                                                                                                                                                                                                                                                                                          | 68024   | Advanced | Display Results More ▼ |             |          |
| 14                    | exp Balloon Occlusion/                                                                                                                                                                                                                                                                                                                                      | 3797    | Advanced | Display Results More ▼ |             |          |
| 15                    | reboa.mp.                                                                                                                                                                                                                                                                                                                                                   | 300     | Advanced | Display Results More ▼ |             |          |
| 16                    | aortic occlusion.mp.                                                                                                                                                                                                                                                                                                                                        | 1526    | Advanced | Display Results More ▼ |             |          |
| 17                    | h?emostatic device.mp.                                                                                                                                                                                                                                                                                                                                      | 87      | Advanced | Display Results More ▼ |             |          |
| 18                    | (junction* adj3 tourniquet).mp. [mp=title, abstract, original title, name of substance word, subject heading word, floating sub-heading word, keyword heading word, organism supplementary concept word, protocol supplementary concept word, rare disease supplementary concept word, unique identifier, synonyms]                                         | 53      | Advanced | Display Results More ▼ |             |          |
| 19                    | (abdom* adj3 tourniquet).mp. [mp=title, abstract, original title, name of substance word, subject heading word, floating sub-heading word, keyword heading word, organism supplementary concept word, protocol supplementary concept word, rare disease supplementary concept word, unique identifier, synonyms]                                            | 24      | Advanced | Display Results More ▼ |             |          |
| 20                    | ITClamp.mp.                                                                                                                                                                                                                                                                                                                                                 | 15      | Advanced | Display Results More ▼ |             |          |
| 21                    | tamponade therap*.mp. [mp=title, abstract, original title, name of substance word, subject heading word, floating sub-heading word, keyword heading word, organism supplementary concept word, protocol supplementary concept word, rare disease supplementary concept word, unique identifier, synonyms]                                                   | 12      | Advanced | Display Results More ▼ |             |          |
| 22                    | 14 or 15 or 16 or 17 or 18 or 19 or 20 or 21                                                                                                                                                                                                                                                                                                                | 5371    | Advanced | Display Results More ▼ |             |          |
| 23                    | 5 and 13 and 22                                                                                                                                                                                                                                                                                                                                             | 88      | Advanced | Display Results More ▼ |             |          |

Figure S2. Medline search strategy

|                          |     |                                                                                                                           |                                                                       |                                                                                              |
|--------------------------|-----|---------------------------------------------------------------------------------------------------------------------------|-----------------------------------------------------------------------|----------------------------------------------------------------------------------------------|
| <input type="checkbox"/> | S20 | S5 AND S11 AND S19                                                                                                        | Expanders - Apply equivalent subjects<br>Search modes - BooleanPhrase | <a href="#">View Results (55)</a>   <a href="#">View Details</a>   <a href="#">Edit</a>      |
| <input type="checkbox"/> | S19 | S12 OR S13 OR S14 OR S15 OR S16 OR S17 OR S18                                                                             | Expanders - Apply equivalent subjects<br>Search modes - BooleanPhrase | <a href="#">View Results (353)</a>   <a href="#">View Details</a>   <a href="#">Edit</a>     |
| <input type="checkbox"/> | S18 | "tamponade therap"                                                                                                        | Expanders - Apply equivalent subjects<br>Search modes - BooleanPhrase | <a href="#">View Results (214)</a>   <a href="#">View Details</a>   <a href="#">Edit</a>     |
| <input type="checkbox"/> | S17 | "iTClamp"                                                                                                                 | Expanders - Apply equivalent subjects<br>Search modes - BooleanPhrase | <a href="#">View Results (19)</a>   <a href="#">View Details</a>   <a href="#">Edit</a>      |
| <input type="checkbox"/> | S16 | "abdom* n3 tourniquet"                                                                                                    | Expanders - Apply equivalent subjects<br>Search modes - BooleanPhrase | <a href="#">View Results (5)</a>   <a href="#">View Details</a>   <a href="#">Edit</a>       |
| <input type="checkbox"/> | S15 | "junction* n3 tourniquet"                                                                                                 | Expanders - Apply equivalent subjects<br>Search modes - BooleanPhrase | <a href="#">View Results (5)</a>   <a href="#">View Details</a>   <a href="#">Edit</a>       |
| <input type="checkbox"/> | S14 | "hemostatic device"                                                                                                       | Expanders - Apply equivalent subjects<br>Search modes - BooleanPhrase | <a href="#">View Results (2)</a>   <a href="#">View Details</a>   <a href="#">Edit</a>       |
| <input type="checkbox"/> | S13 | "aortic occlusion"                                                                                                        | Expanders - Apply equivalent subjects<br>Search modes - BooleanPhrase | <a href="#">View Results (219)</a>   <a href="#">View Details</a>   <a href="#">Edit</a>     |
| <input type="checkbox"/> | S12 | "reboa" OR (MH "Balloon Occlusion")                                                                                       | Expanders - Apply equivalent subjects<br>Search modes - BooleanPhrase | <a href="#">View Results (457)</a>   <a href="#">View Details</a>   <a href="#">Edit</a>     |
| <input type="checkbox"/> | S11 | S7 OR S8 OR S9 OR S10                                                                                                     | Expanders - Apply equivalent subjects<br>Search modes - BooleanPhrase | <a href="#">View Results (53,488)</a>   <a href="#">View Details</a>   <a href="#">Edit</a>  |
| <input type="checkbox"/> | S10 | "helicopter or "air ambulance"                                                                                            | Expanders - Apply equivalent subjects<br>Search modes - BooleanPhrase | <a href="#">View Results (31)</a>   <a href="#">View Details</a>   <a href="#">Edit</a>      |
| <input type="checkbox"/> | S9  | "emergency healthcare"                                                                                                    | Expanders - Apply equivalent subjects<br>Search modes - BooleanPhrase | <a href="#">View Results (152)</a>   <a href="#">View Details</a>   <a href="#">Edit</a>     |
| <input type="checkbox"/> | S8  | (MH "Emergency Service")                                                                                                  | Expanders - Apply equivalent subjects<br>Search modes - BooleanPhrase | <a href="#">View Results (55,541)</a>   <a href="#">View Details</a>   <a href="#">Edit</a>  |
| <input type="checkbox"/> | S7  | "pre-hospital" or "prehospital" or "pre hospital" or "ambulance" or "paramedic" or "out of hospital" OR (MH "Ambulances") | Expanders - Apply equivalent subjects<br>Search modes - BooleanPhrase | <a href="#">View Results (37,327)</a>   <a href="#">View Details</a>   <a href="#">Edit</a>  |
| <input type="checkbox"/> | S6  | S1 OR S2 OR S3 OR S4 OR S5                                                                                                | Expanders - Apply equivalent subjects<br>Search modes - BooleanPhrase | <a href="#">View Results (409,302)</a>   <a href="#">View Details</a>   <a href="#">Edit</a> |
| <input type="checkbox"/> | S5  | "non-compressible"                                                                                                        | Expanders - Apply equivalent subjects<br>Search modes - BooleanPhrase | <a href="#">View Results (55)</a>   <a href="#">View Details</a>   <a href="#">Edit</a>      |
| <input type="checkbox"/> | S4  | "exsanguination"                                                                                                          | Expanders - Apply equivalent subjects<br>Search modes - BooleanPhrase | <a href="#">View Results (317)</a>   <a href="#">View Details</a>   <a href="#">Edit</a>     |
| <input type="checkbox"/> | S3  | "bleeding"                                                                                                                | Expanders - Apply equivalent subjects<br>Search modes - BooleanPhrase | <a href="#">View Results (45,777)</a>   <a href="#">View Details</a>   <a href="#">Edit</a>  |
| <input type="checkbox"/> | S2  | (MH "Hemorrhage")                                                                                                         | Expanders - Apply equivalent subjects<br>Search modes - BooleanPhrase | <a href="#">View Results (55,192)</a>   <a href="#">View Details</a>   <a href="#">Edit</a>  |
| <input type="checkbox"/> | S1  | (MH "Trauma") OR (MH "Wounds and Injuries")                                                                               | Expanders - Apply equivalent subjects                                 | <a href="#">View Results (324,882)</a>   <a href="#">View Details</a>   <a href="#">Edit</a> |

**Figure S3.** CINAHL search strategy

**Table S1.** Web of Science search strategy

| Web of Science                                                                                                                                                                                                                                                                                                                                                                                                                                                                                                                                                                                                                                                                    |
|-----------------------------------------------------------------------------------------------------------------------------------------------------------------------------------------------------------------------------------------------------------------------------------------------------------------------------------------------------------------------------------------------------------------------------------------------------------------------------------------------------------------------------------------------------------------------------------------------------------------------------------------------------------------------------------|
| ((ALL=(trauma OR wound OR injury OR haemorrhage OR bleeding OR blood loss OR exsanguination OR non-compressible)) AND ALL=("pre-hospital" OR "pre-hospital" OR "pre hospital" OR "out-of-hospital" OR ambulance OR helicopter OR "air ambulance" OR paramedic OR "emergency medical technician" OR "emergency health care" OR "emergency health service")) AND ALL=(REBOA OR "resuscitative endovascular balloon occlusion of the aorta" OR "balloon occlusion" OR "aortic occlusion" OR "aorta occlusion" OR "hemostatic device" OR "tamponade therap*" OR iTClampTM OR "abdominal aortic junctional tourniquet" OR "junction* near/3 tourniquet" OR "abdom* near/3 tourniquet") |
